# Supplementary material
Source: PubMed Central journal article supplement (PMC6014897)
Supplement: NIHMS958568-supplement-4.pdf [file NIHMS958568-supplement-4.pdf]

## Supplemental Information

### Linking Genomic and Metabolomic Natural Variation Uncovers Nematode Pheromone Biosynthesis

Jan M. Falcke,<sup>a,1</sup> Neelanjan Bose,<sup>b,1</sup> Alexander B. Artyukhin,<sup>b</sup> Christian Rödelsperger,<sup>a</sup> Gabriel V. Markov<sup>a,c</sup>, Joshua J. Yim,<sup>a,b</sup> Dominik Grimm,<sup>d</sup> Marc H. Claassen,<sup>a</sup> Oishika Panda,<sup>b</sup> Joshua A. Baccile,<sup>b</sup> Ying, K. Zhang,<sup>b</sup> Henry. H. Le,<sup>b</sup> Dino Jolic,<sup>a</sup> Frank C. Schroeder,<sup>b,\*</sup> Ralf J. Sommer<sup>a,\*</sup>

<sup>a</sup>Department for Evolutionary Biology, Max-Planck-Institute for Developmental Biology, 72076 Tübingen, Germany

<sup>b</sup>Boyce Thompson Institute and Department of Chemistry and Chemical Biology, Cornell University, Ithaca, NY 14853, USA

<sup>c</sup>Sorbonne Universités, UPMC Univ Paris 06, CNRS, UMR 8227 Integrative Biology of Marine Models, Station Biologique de Roscoff, France

<sup>d</sup>Machine Learning and Computational Biology Research Group, Max Planck Institute for Intelligent Systems, 72076 Tübingen, Germany

<sup>1</sup>These authors contributed equally to this work.

## Supplementary Information

### Table of Contents

#### Supplementary Figures

**Figure S1.** GWAS and metabolomics of *P. pacificus* strains and mutants. Related to Figures 2 and 3.

**Figure S2.** MS/MS characterization of metabolites. Related to Figures 3 and 4.

**Figure S3.** Identification of phascr#3 in transgenic *C. elegans* expressing *hsp16.41::Ppa-uar-1* via co-injection with a synthetic sample and comparison of MS/MS spectra. Related to Figures 3 and 4.

**Figure S4.** Alignment of *Ppa-uar-1* amino acid sequence with best protein BLAST hits from human, mouse, *D. melanogaster*, and *E. coli*. Related to Figure 3.

**Figure S5.** Phylogeny of esterases in nematodes. Related to Figure 3.

#### Supplementary Tables

**Table S1.** Amino acid sequence of *Ppa-uar-1* and Escherichia coli codon optimized *Ppa-uar-1*. Related to Figure 3.

**Table S2.** NMR spectroscopic data of ubas#6. Related to Figures 3 and 4.

**Table S5.** MS/MS data of new ubas ascariosides. Related to Figure 4.

## Supplemental Figures

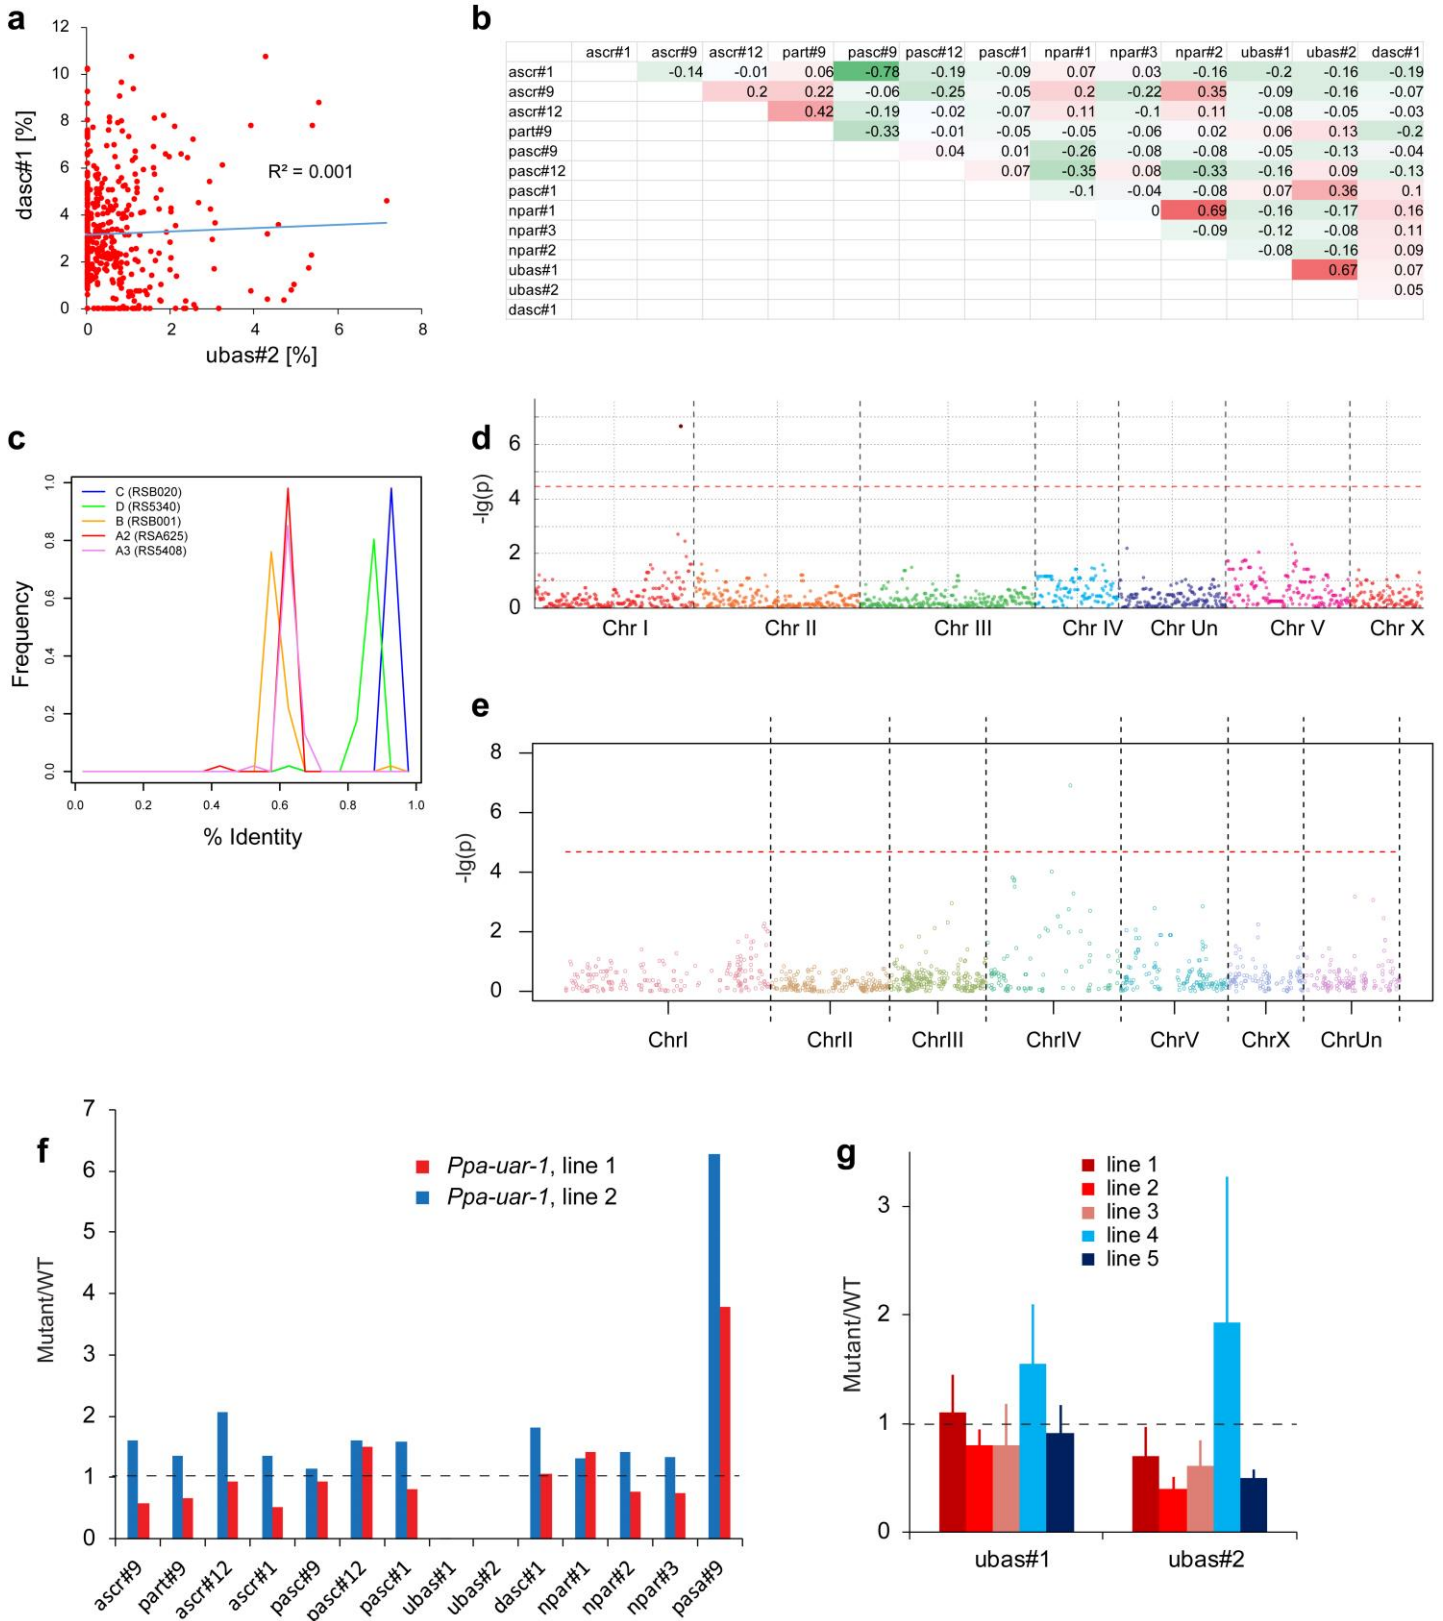

**Figure S1. GWAS and metabolomics of *P. pacificus* strains and mutants.** Related to Figures 2 and 3. a) Correlation between dasc#1 and ubas#2. b) Pearson correlation coefficient matrix for all pairwise correlations among *P. pacificus* ascarosides. Cell color indicates negative (green) or

positive (red) correlations; c) Clade assignment of collected *P. pacificus* strains. Collected *P. pacificus* strains were genotyped by RAD-seq and were compared with whole-genome-resequencing data of representative members for all 1a Reunion clades. The x-axis shows the pairwise percentage identity between a particular strain and each of the five clade representatives (Rödelsperger et al. 2014, McGaughan et al. 2016). Only sites that distinguish the five representative strains and that had sufficient coverage in all six strains ( $N \approx 20,000$ ) were compared. The y-axis shows the frequency of strains at a given percentage identity value; d, e) Manhattan plots for ubas#2 and dasc#1, respectively. Results of genome wide association study (GWAS) using genomic data created with restriction site associated DNA (RAD) marker sequencing and metabolite abundances (ubas#2 in d) and dasc#1 in e)) as phenotypic dataset. Each dot represents the p-value for one SNP marker and its chromosomal location; f) Endo-metabolome ascaroside profile of *Ppa-uar-1* mutant strains. g) ubas#1 and ubas#2 levels in Contig39-snap124 mutant exo-metabolome. In f) and g) NDMM abundances are normalized to average levels in wildtype (RS2333, dashed line).

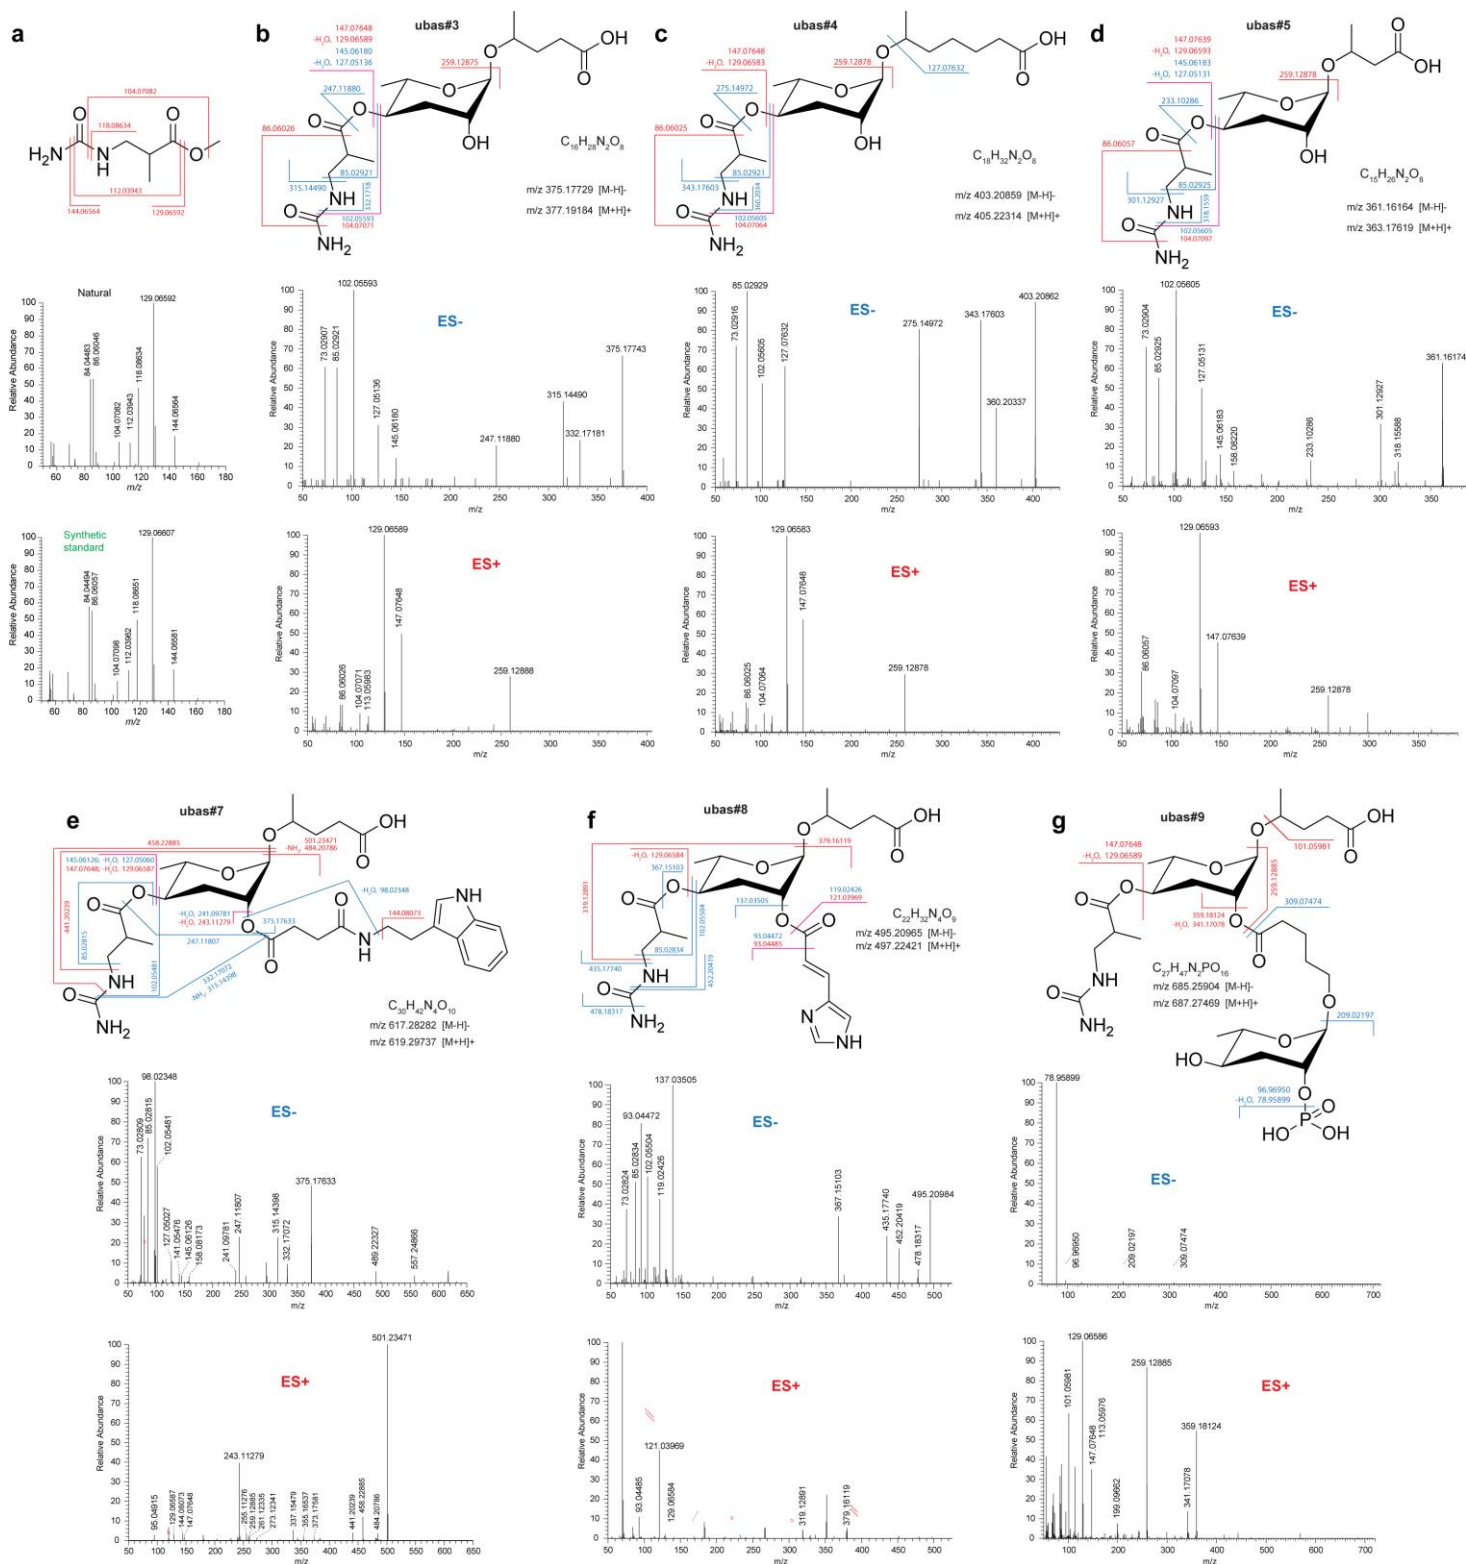

Fragmentation of ubas#5 in positive and negative ionization mode MS/MS. e) Fragmentation of ubas#7 in positive and negative ionization mode MS/MS. f) Fragmentation of ubas#8 in positive and negative ionization mode MS/MS. g) Fragmentation of ubas#9 in positive and negative ionization mode MS/MS.

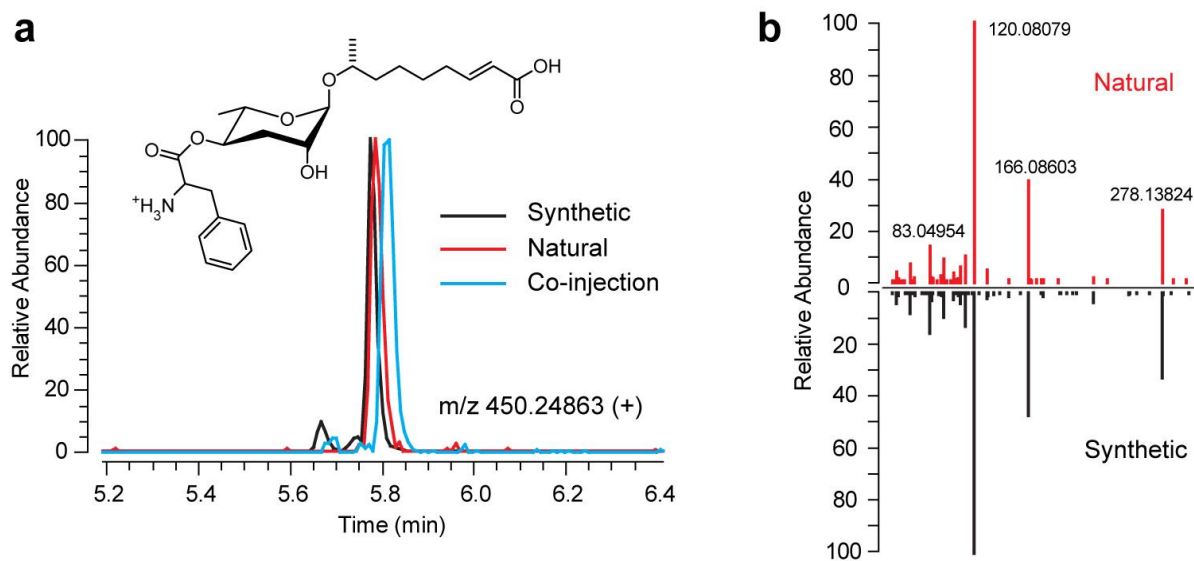

**Figure S3. Identification of phascr#3 in transgenic *C. elegans* expressing *hsp16.41::Ppa-uar-1* via co-injection with a synthetic sample and comparison of MS/MS spectra.** Related to Figures 3 and 4. a) Coinjection of metabolome sample from transgenic *C. elegans* expressing *hsp16.41::Ppa-uar-1* and synthetic phascr#3. b) Comparison of high-resolution MS/MS spectra of natural and synthetic phascr#3.



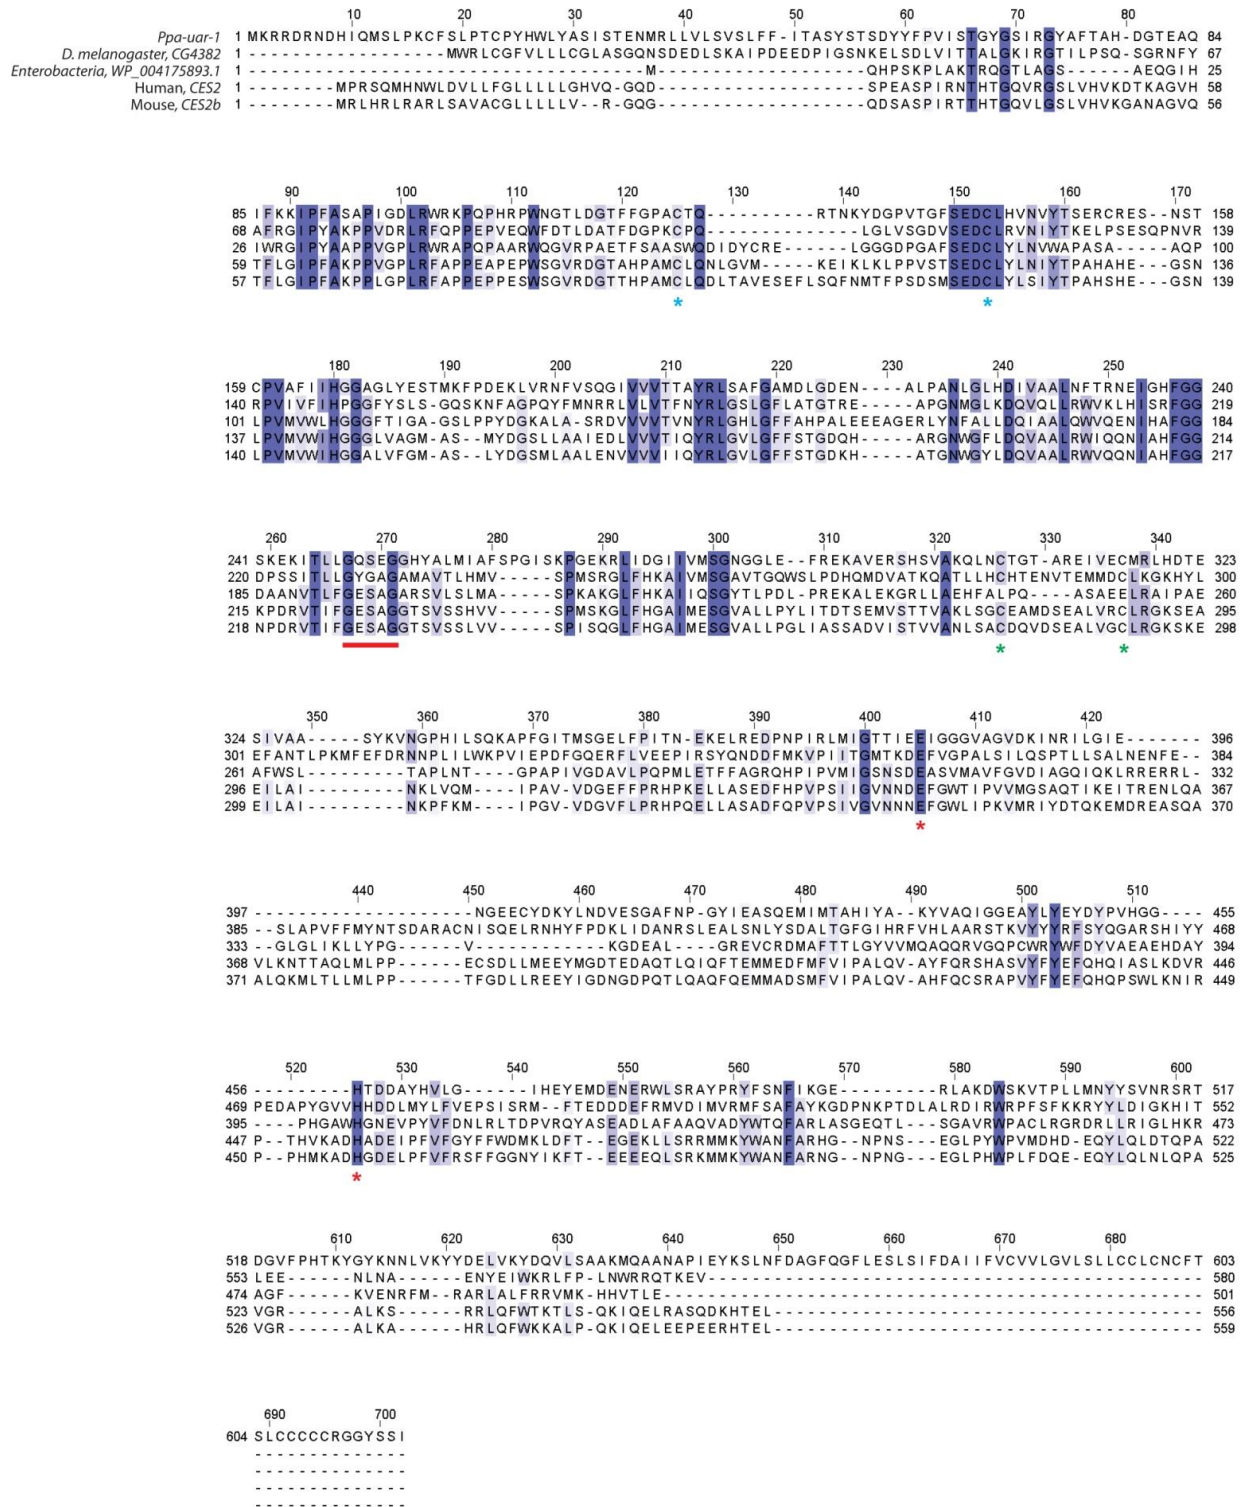

**Figure S4. Alignment of *Ppa-uar-1* amino acid sequence with best protein BLAST hits from human, mouse, *D. melanogaster*, and *E. coli*. Related to Figure 3. Active site residues and serine hydrolase consensus sequence motif are marked with red asterisks and red line. Pairs of conserved cysteines forming disulfide bridges are marked with green and blue asterisks.**





## Supplemental Tables

**Table S1. Amino acid sequence of *Ppa-uar-1* and *Escherichia coli* codon optimized *Ppa-uar-1*.**  
Related to Figure 3.

### **Amino acid sequence of *Ppa-uar-1***

MKRRDRNDHIQMSLPKCFSLPTCPYHWLYASISTENMROLLVLSVSLFFITASYSTSDYYFPVISTGY  
 GSIRGYAFTAHDGTEAQIFKKIPFASAPIGDLRWRKQPQHRPWNGTLDGTFFGPACTQRTNKYDG  
 PVTGFSEDCLHVNVTYTSERCRESNSTCPVAFIIHGGAGLYESTMKFPDEKLVRNFVSQGIVVTTA  
 YRLSAFGAMDLDENALPANLGLHDIVAALNFTTRNEIGHFVGGSSKEKITLLGQSEGGHYALMIAFSP  
 GISKPGEKRLIDGIIVMMSGNGGLEFREKAVERSHSVAKQLNCTGTAREIVECMRLHDTESIVAASYK  
 VNGPHILSQKAPFGITMSGELFPITNEKELREDPNPIRLMIGTTIEEIGGGVAGVDKINRILGIENGEE  
 CYDKYLNDVESGAFNPGYIEASQEMIMTAHIYAKYVAQIGGEAYLYEYDYPVHGGHTDDAYHVLGI  
 HEYEMDENERWLSRAYPRYFSNFIKGERLAKDWSKVTPLLMNYYSVNRSRDGVFPHTKYGYKN  
 NLVKYYDELVKYDQVLSAAKMQAANAPIEYKSLNFDAGFQGFLESLSIFDAIIFVCVVLGLVLSLLCCL  
 CNCFTSLCCCCCRGGYSSI

### ***Escherichia coli* codon optimized *Ppa-uar-1***

ATGAAACGTCGCGATCGCAATGACCATATTGAGATGAGCCTTCCGAAATGTTTCTCGTTGCCT  
 ACGTGTCCCTACCATTGGTTATACGCTTCAATTTCTACAGAGAATATGCGTTTATTGGTGTAT  
 CCGTTTCCTTGTCTTTATTACCGCCTCATACTCTACCTCTGATTACTACTTCCCAGTCATCTCG  
 ACTGGTTACGGCTCGATTGCGGGTATGCATTTACCGCACACGACGGTACTGAAGCGCAAAT  
 TTTCAAAAAGATCCCCTTTGCCTCGGCACCCATCGGTGACTTGCCTTGGCGTAAACCCAGCC  
 ACATCGTCCTTGAACGGAACACTGGATGGTACTTTTTTCGGACCCGCTTGCCTCAGCGTAC  
 TAATAAGTACGACGGGCCGTTACTGGGTTTTTCGGAGGACTGTTTGCATGTGAATGTATACAC  
 ATCAGAGCGCTGCCGTGAGTCCAATTCTACTTGTCTGTAGCCTTCATCATTTCATGGAGGAGC  
 AGGTCTGTATGAGTCCACAATGAAATTTCCCGATGAAAAGCTGGTTCGTAATTTTGTGTACAA  
 GGCATCGTCGTGGTAACGACTGCTTACCGCCTGAGCGCCTTTGGTGCTATGGACCTGGGAGA  
 TGAGAATGCATTACCGGCCAATCTTGGTCTTCACGATATTGTTGCAGCATTAAATTTTACTCGT  
 AACGAAATTGGCCATTTTGGGGGGTTCGAAAGAAAAGATTACGCTTCTGGGGCAAAGCGAGGG  
 GGGTCATTATGCTCTGATGATCGCCTTTTCTCCAGGCATCTCAAAACCTGGTGAGAAACGTCT  
 GATTGATGGAATCATCGTAATGAGTGGAAACGGTGGACTTGAGTTCCGTGAAAAAGCCGTGG  
 AGCGCAGTCACAGTGTGCTAAGCAATTAATTGTACGGGAACGGCTCGTGAAATTGTGGAAT  
 GTATGCGTCTGCATGATACAGAAAGTATTGTCGCTGCCAGTTATAAAGTAAACGGTCCCTCACA  
 TTTTGTACAAAAGGCGCCCTTCGGGATTACAATGTCGGGTGAACTGTTTCCGATCACAAATG  
 AAAAAGAGTTGCGCGAAGATCCGAACCCTATTCGCTTAATGATCGGCACCACCATCGAAGAGA  
 TTGGCGGGGGTGTTCAGGCGTAGATAAAAATCAACCGTATCTTAGGGATTGAGAATGGAGAA  
 GAGTGTACGACAAGTACTTAAACGATGTAGAATCAGGCGCTTTCAATCCTGGATACATCGAA  
 GCATCGCAAGAGATGATTATGACCGCTCATATTTACGCCAAGTACGTTGCCCAAATTGGGGGG  
 GAAGCCTACCTGTACGAGTATGATTATCCGGTACACGGCGGGCATAACAGATGATGCCTACCA  
 CGTTTTGGGGATCCACGAATATGAAATGGATGAGAACGAACGCTGGCTTTCTCGCGCCTATCC  
 GCGTTATTTTTCCAACCTCATTAAGGTGAACGTCTTGCTAAAGACTGGTCAAAGGTTACCCCA  
 TTAATGATGAATTAACAGTGTGAACCGTTCCTGACAGACGGTGTCTTCCACACACCCAAA  
 TATGGATACAAAACAACCTGGTTAAATATTATGACGAATTAGTAAAGTATGATCAAGTCTTAA  
 GCGCCGCTAAAATGCAGGCCGCGAATGCGCCAATCGAGTACAAGAGTTTAACTTTGATGCA  
 GGGTTCCAAGGGTTTCTGGAATCTCTGAGCATCTTCGACGCCATTATCTTTGTGTGTGATG  
 TTGGGCGTCCTTTCCTTGTATGCTGCCTGTGTAACCTGTTTTACATCGCTGTGTTGCTGTTGCT  
 GTCGCGGGGGTACTCATCAATCTAG

**Table S2. NMR spectroscopic data of ubas#6.** Related to Figures 3 and 4. Data were obtained via dqfCOSY spectra (solvent CD<sub>3</sub>OD, resonance frequency 800 MHz)

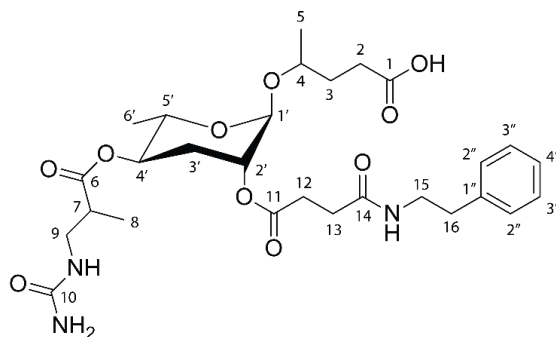

| Position           | <sup>1</sup> H [ppm] | <sup>1</sup> H- <sup>1</sup> H coupling constants (Hz) |
|--------------------|----------------------|--------------------------------------------------------|
| 1                  |                      |                                                        |
| 2-H <sub>a</sub>   | 2.26                 | $J_{2a,2b} = 16, J_{2a,3} \approx 7$                   |
| 2-H <sub>b</sub>   | 2.32                 | $J_{2b,3} \approx 7$                                   |
| 3                  | 1.83                 |                                                        |
| 4                  | 3.83                 | $J_{4,5} = 6.2$                                        |
| 5                  | 1.15                 |                                                        |
| 6                  |                      |                                                        |
| 7                  | 2.68                 | $J_{7,8} = 7.3$                                        |
| 8                  | 1.13                 |                                                        |
| 9                  | 3.25                 |                                                        |
| 10                 |                      |                                                        |
| 11                 |                      |                                                        |
| 12                 | 2.65*                | $J_{12,13} = 7.1$                                      |
| 13                 | 2.48*                |                                                        |
| 14                 |                      |                                                        |
| 15                 | 3.40                 | $J_{15,16} = 7.5$                                      |
| 16                 | 2.79                 |                                                        |
| 1'                 | 4.77                 | $J_{1',2'} = 1.8$                                      |
| 2'                 | 4.81                 | $J_{2',3'eq} = 5.8, J_{2',3'ax} = 6.1$                 |
| 3'-H <sub>ax</sub> | 2.02                 | $J_{3'eq,3'ax} = 13.5; J_{3'eq,4'} = 4.2$              |
| 3'-H <sub>eq</sub> | 2.09                 | $J_{3'ax,4'} = 11.4$                                   |
| 4'                 | 4.74                 | $J_{4',5'} = 9.1$                                      |
| 5'                 | 3.99                 | $J_{5',6'} = 6.2$                                      |
| 6'                 | 1.15                 |                                                        |
| 1''                |                      |                                                        |
| 2''                | 7.22                 | $J_{2'',3''} = 7.9$                                    |
| 3''                | 7.28                 | $J_{3'',4''} = 7.7$                                    |
| 4''                | 7.18                 |                                                        |

\*Signals could be interchanged

**Table S5. MS/MS data of new ubas ascarosides.** Related to Figure 4. Data for ubas#1 and #2 are included for comparison. The first entry for each compound (bold) is a molecular ion, the other are MS/MS fragments.

| SMID      | RT<br>(min)                                                                | ES-              |                                                                            |                   |                                                                            | ES+              |                                                                            |                   |                                                                            |
|-----------|----------------------------------------------------------------------------|------------------|----------------------------------------------------------------------------|-------------------|----------------------------------------------------------------------------|------------------|----------------------------------------------------------------------------|-------------------|----------------------------------------------------------------------------|
|           |                                                                            | <i>m/z</i> (exp) | <i>formula</i>                                                             | <i>m/z</i> (calc) | $\Delta$ ppm                                                               | <i>m/z</i> (exp) | <i>formula</i>                                                             | <i>m/z</i> (calc) | $\Delta$ ppm                                                               |
| ubas#1    | 5.88                                                                       | <b>605.29340</b> | <b>C<sub>27</sub>H<sub>45</sub>N<sub>2</sub>O<sub>13</sub><sup>-</sup></b> | <b>605.29271</b>  | 1.1                                                                        | <b>607.30627</b> | <b>C<sub>27</sub>H<sub>47</sub>N<sub>2</sub>O<sub>13</sub><sup>+</sup></b> | <b>607.30727</b>  | -1.6                                                                       |
|           |                                                                            | 73.02824         | C <sub>3</sub> H <sub>5</sub> O <sub>2</sub> <sup>-</sup>                  | 73.02950          | -17.2                                                                      | 69.03397         | C <sub>4</sub> H <sub>5</sub> O <sup>+</sup>                               | 69.03349          | 7.0                                                                        |
|           |                                                                            | 85.02832         | C <sub>4</sub> H <sub>5</sub> O <sub>2</sub> <sup>-</sup>                  | 85.02950          | -13.9                                                                      | 86.06026         | C <sub>4</sub> H <sub>8</sub> NO <sup>+</sup>                              | 86.06004          | 2.6                                                                        |
|           |                                                                            | 99.04409         | C <sub>5</sub> H <sub>7</sub> O <sub>2</sub> <sup>-</sup>                  | 99.04515          | -10.7                                                                      | 95.04920         | C <sub>6</sub> H <sub>7</sub> O <sup>+</sup>                               | 95.04914          | 0.6                                                                        |
|           |                                                                            | 102.05503        | C <sub>4</sub> H <sub>8</sub> NO <sub>2</sub> <sup>-</sup>                 | 102.05605         | -10.0                                                                      | 101.05979        | C <sub>5</sub> H <sub>9</sub> O <sub>2</sub> <sup>+</sup>                  | 101.05971         | 0.8                                                                        |
|           |                                                                            | 127.05054        | C <sub>5</sub> H <sub>7</sub> N <sub>2</sub> O <sub>2</sub> <sup>-</sup>   | 127.05130         | -6.0                                                                       | 113.05974        | C <sub>6</sub> H <sub>9</sub> O <sub>2</sub> <sup>+</sup>                  | 113.05971         | 0.3                                                                        |
|           |                                                                            | 145.06137        | C <sub>5</sub> H <sub>9</sub> N <sub>2</sub> O <sub>3</sub> <sup>-</sup>   | 145.06187         | -3.4                                                                       | 129.06584        | C <sub>5</sub> H <sub>9</sub> N <sub>2</sub> O <sub>2</sub> <sup>+</sup>   | 129.06585         | -0.1                                                                       |
|           |                                                                            | 247.11865        | C <sub>11</sub> H <sub>19</sub> O <sub>6</sub> <sup>-</sup>                | 247.11871         | -0.2                                                                       | 147.07642        | C <sub>5</sub> H <sub>11</sub> N <sub>2</sub> O <sub>3</sub> <sup>+</sup>  | 147.07642         | 0                                                                          |
|           |                                                                            | 285.13428        | C <sub>14</sub> H <sub>21</sub> O <sub>6</sub> <sup>-</sup>                | 285.13436         | -0.3                                                                       | 199.09679        | C <sub>10</sub> H <sub>15</sub> O <sub>4</sub> <sup>+</sup>                | 199.09649         | 1.5                                                                        |
|           |                                                                            | 477.23398        | C <sub>22</sub> H <sub>37</sub> O <sub>11</sub> <sup>-</sup>               | 477.23414         | -0.3                                                                       | 242.10237        | C <sub>11</sub> H <sub>16</sub> NO <sub>5</sub> <sup>+</sup>               | 242.10230         | 0.3                                                                        |
|           |                                                                            | 545.26044        | C <sub>26</sub> H <sub>41</sub> O <sub>12</sub> <sup>-</sup>               | 545.26035         | 0.2                                                                        | 259.12875        | C <sub>11</sub> H <sub>19</sub> N <sub>2</sub> O <sub>5</sub> <sup>+</sup> | 259.12885         | -0.4                                                                       |
|           |                                                                            | 562.28735        | C <sub>26</sub> H <sub>44</sub> NO <sub>12</sub> <sup>-</sup>              | 562.28690         | -0.8                                                                       | 341.17017        | C <sub>16</sub> H <sub>25</sub> N <sub>2</sub> O <sub>6</sub> <sup>+</sup> | 341.17071         | -1.6                                                                       |
|           |                                                                            | 588.26709        | C <sub>27</sub> H <sub>42</sub> NO <sub>13</sub> <sup>-</sup>              | 588.26616         | 1.6                                                                        | 359.18100        | C <sub>16</sub> H <sub>27</sub> N <sub>2</sub> O <sub>7</sub> <sup>+</sup> | 359.18128         | -0.8                                                                       |
|           |                                                                            | ubas#2           | 6.1                                                                        | <b>619.30878</b>  | <b>C<sub>28</sub>H<sub>47</sub>N<sub>2</sub>O<sub>13</sub><sup>-</sup></b> | <b>619.30836</b> | 0.7                                                                        | <b>621.32208</b>  | <b>C<sub>28</sub>H<sub>49</sub>N<sub>2</sub>O<sub>13</sub><sup>-</sup></b> |
| 73.02822  | C <sub>3</sub> H <sub>5</sub> O <sub>2</sub> <sup>-</sup>                  |                  |                                                                            | 73.02950          | -17.5                                                                      | 86.06029         | C <sub>4</sub> H <sub>8</sub> NO <sup>+</sup>                              | 86.06004          | 2.9                                                                        |
| 85.02831  | C <sub>4</sub> H <sub>5</sub> O <sub>2</sub> <sup>-</sup>                  |                  |                                                                            | 85.02950          | -14.0                                                                      | 95.04923         | C <sub>6</sub> H <sub>7</sub> O <sup>+</sup>                               | 95.04914          | 0.9                                                                        |
| 99.04408  | C <sub>5</sub> H <sub>7</sub> O <sub>2</sub> <sup>-</sup>                  |                  |                                                                            | 99.04515          | -10.8                                                                      | 113.05981        | C <sub>6</sub> H <sub>9</sub> O <sub>2</sub> <sup>+</sup>                  | 113.05971         | 0.9                                                                        |
| 102.05501 | C <sub>4</sub> H <sub>8</sub> NO <sub>2</sub> <sup>-</sup>                 |                  |                                                                            | 102.05605         | -10.2                                                                      | 115.07544        | C <sub>6</sub> H <sub>11</sub> O <sub>2</sub> <sup>+</sup>                 | 115.07536         | 0.7                                                                        |
| 113.05989 | C <sub>6</sub> H <sub>9</sub> O <sub>2</sub> <sup>-</sup>                  |                  |                                                                            | 113.06080         | -8.0                                                                       | 129.06581        | C <sub>5</sub> H <sub>9</sub> N <sub>2</sub> O <sub>2</sub> <sup>+</sup>   | 129.06585         | -0.3                                                                       |
| 127.05053 | C <sub>5</sub> H <sub>7</sub> N <sub>2</sub> O <sub>2</sub> <sup>-</sup>   |                  |                                                                            | 127.05130         | -6.1                                                                       | 147.07651        | C <sub>5</sub> H <sub>11</sub> N <sub>2</sub> O <sub>3</sub> <sup>+</sup>  | 147.07642         | 0.6                                                                        |
| 145.06133 | C <sub>5</sub> H <sub>9</sub> N <sub>2</sub> O <sub>3</sub> <sup>-</sup>   |                  |                                                                            | 145.06187         | -3.7                                                                       | 199.09660        | C <sub>10</sub> H <sub>15</sub> O <sub>4</sub> <sup>+</sup>                | 199.09649         | 0.6                                                                        |
| 261.13422 | C <sub>12</sub> H <sub>21</sub> O <sub>6</sub> <sup>-</sup>                |                  |                                                                            | 261.13436         | -0.5                                                                       | 259.12875        | C <sub>11</sub> H <sub>19</sub> N <sub>2</sub> O <sub>5</sub> <sup>+</sup> | 259.12885         | -0.4                                                                       |
| 299.14996 | C <sub>15</sub> H <sub>23</sub> O <sub>6</sub> <sup>-</sup>                |                  |                                                                            | 299.15001         | -0.2                                                                       | 355.18661        | C <sub>17</sub> H <sub>27</sub> N <sub>2</sub> O <sub>6</sub> <sup>+</sup> | 355.18636         | 0.7                                                                        |
| 357.16727 | C <sub>16</sub> H <sub>25</sub> N <sub>2</sub> O <sub>7</sub> <sup>-</sup> |                  |                                                                            | 357.16672         | 1.5                                                                        | 373.19626        | C <sub>17</sub> H <sub>29</sub> N <sub>2</sub> O <sub>7</sub> <sup>+</sup> | 373.19693         | -1.8                                                                       |
| 491.25000 | C <sub>23</sub> H <sub>39</sub> O <sub>11</sub> <sup>-</sup>               |                  |                                                                            | 491.24979         | -0.4                                                                       |                  |                                                                            |                   |                                                                            |
| 559.27618 | C <sub>27</sub> H <sub>43</sub> O <sub>12</sub> <sup>-</sup>               |                  |                                                                            | 559.27600         | 0.3                                                                        |                  |                                                                            |                   |                                                                            |
| 576.30249 | C <sub>27</sub> H <sub>46</sub> NO <sub>12</sub> <sup>-</sup>              |                  |                                                                            | 576.30255         | -0.1                                                                       |                  |                                                                            |                   |                                                                            |
| 602.28241 | C <sub>28</sub> H <sub>44</sub> NO <sub>13</sub> <sup>-</sup>              | 602.28181        | 1.0                                                                        |                   |                                                                            |                  |                                                                            |                   |                                                                            |
| ubas#3    | 4.58                                                                       | <b>375.17731</b> | <b>C<sub>16</sub>H<sub>27</sub>N<sub>2</sub>O<sub>8</sub><sup>-</sup></b>  | <b>375.17729</b>  | 0.1                                                                        | <b>377.19110</b> | <b>C<sub>16</sub>H<sub>29</sub>N<sub>2</sub>O<sub>8</sub><sup>-</sup></b>  | <b>377.19184</b>  | -2.0                                                                       |
|           |                                                                            | 73.02907         | C <sub>3</sub> H <sub>5</sub> O <sub>2</sub> <sup>-</sup>                  | 73.02950          | -5.9                                                                       | 58.06572         | C <sub>3</sub> H <sub>8</sub> N <sup>+</sup>                               | 58.06513          | 10.2                                                                       |
|           |                                                                            | 85.02921         | C <sub>4</sub> H <sub>5</sub> O <sub>2</sub> <sup>-</sup>                  | 85.02950          | -3.4                                                                       | 69.03393         | C <sub>4</sub> H <sub>5</sub> O <sup>+</sup>                               | 69.03349          | 6.4                                                                        |
|           |                                                                            | 102.05593        | C <sub>4</sub> H <sub>8</sub> NO <sub>2</sub> <sup>-</sup>                 | 102.05605         | -1.2                                                                       | 86.06026         | C <sub>4</sub> H <sub>8</sub> NO <sup>+</sup>                              | 86.06004          | 2.6                                                                        |
|           |                                                                            | 127.05136        | C <sub>5</sub> H <sub>7</sub> N <sub>2</sub> O <sub>2</sub> <sup>-</sup>   | 127.05130         | 0.5                                                                        | 104.07066        | C <sub>4</sub> H <sub>10</sub> NO <sub>2</sub> <sup>+</sup>                | 104.07060         | 0.6                                                                        |
|           |                                                                            | 145.06180        | C <sub>5</sub> H <sub>9</sub> N <sub>2</sub> O <sub>3</sub> <sup>-</sup>   | 145.06187         | -0.5                                                                       | 113.05983        | C <sub>6</sub> H <sub>9</sub> O <sub>2</sub> <sup>+</sup>                  | 113.05971         | 1.1                                                                        |
|           |                                                                            | 247.11880        | C <sub>11</sub> H <sub>19</sub> O <sub>6</sub> <sup>-</sup>                | 247.11871         | 0.4                                                                        | 129.06589        | C <sub>5</sub> H <sub>9</sub> N <sub>2</sub> O <sub>2</sub> <sup>+</sup>   | 129.06585         | 0.3                                                                        |
|           |                                                                            | 315.14490        | C <sub>15</sub> H <sub>23</sub> O <sub>7</sub> <sup>-</sup>                | 315.14493         | -0.1                                                                       | 147.07648        | C <sub>5</sub> H <sub>11</sub> N <sub>2</sub> O <sub>3</sub> <sup>+</sup>  | 147.07642         | 0.4                                                                        |
|           |                                                                            | 332.17181        | C <sub>15</sub> H <sub>26</sub> NO <sub>7</sub> <sup>-</sup>               | 332.17148         | 1.0                                                                        | 259.12875        | C <sub>11</sub> H <sub>19</sub> N <sub>2</sub> O <sub>5</sub> <sup>+</sup> | 259.12885         | -0.4                                                                       |
| ubas#4    | 5.32                                                                       | <b>403.20853</b> | <b>C<sub>18</sub>H<sub>31</sub>N<sub>2</sub>O<sub>8</sub><sup>-</sup></b>  | <b>403.20859</b>  | -0.1                                                                       | <b>405.22241</b> | <b>C<sub>18</sub>H<sub>33</sub>N<sub>2</sub>O<sub>8</sub><sup>+</sup></b>  | <b>405.22314</b>  | -1.8                                                                       |
|           |                                                                            | 73.02916         | C <sub>3</sub> H <sub>5</sub> O <sub>2</sub> <sup>-</sup>                  | 73.02950          | -4.7                                                                       | 58.06572         | C <sub>3</sub> H <sub>8</sub> N <sup>+</sup>                               | 58.06513          | 10.2                                                                       |
|           |                                                                            | 85.02929         | C <sub>4</sub> H <sub>5</sub> O <sub>2</sub> <sup>-</sup>                  | 85.02950          | -2.5                                                                       | 69.03390         | C <sub>4</sub> H <sub>5</sub> O <sup>+</sup>                               | 69.03349          | 5.9                                                                        |
|           |                                                                            | 102.05605        | C <sub>4</sub> H <sub>8</sub> NO <sub>2</sub> <sup>-</sup>                 | 102.05605         | 0                                                                          | 86.06025         | C <sub>4</sub> H <sub>8</sub> NO <sup>+</sup>                              | 86.06004          | 2.4                                                                        |
|           |                                                                            | 127.07632        | C <sub>7</sub> H <sub>11</sub> O <sub>2</sub> <sup>-</sup>                 | 127.07645         | -1.0                                                                       | 104.07064        | C <sub>4</sub> H <sub>10</sub> NO <sub>2</sub> <sup>+</sup>                | 104.07060         | 0.4                                                                        |
|           |                                                                            | 158.08220        | C <sub>7</sub> H <sub>12</sub> NO <sub>3</sub> <sup>-</sup>                | 158.08227         | -0.4                                                                       | 129.06583        | C <sub>5</sub> H <sub>9</sub> N <sub>2</sub> O <sub>2</sub> <sup>+</sup>   | 129.06585         | -0.2                                                                       |
|           |                                                                            | 275.14972        | C <sub>13</sub> H <sub>23</sub> O <sub>6</sub> <sup>-</sup>                | 275.15001         | -1.1                                                                       | 147.07648        | C <sub>5</sub> H <sub>11</sub> N <sub>2</sub> O <sub>3</sub> <sup>+</sup>  | 147.07642         | 0.4                                                                        |
|           |                                                                            | 343.17603        | C <sub>17</sub> H <sub>27</sub> O <sub>7</sub> <sup>-</sup>                | 343.17623         | -0.6                                                                       | 259.12878        | C <sub>11</sub> H <sub>19</sub> N <sub>2</sub> O <sub>5</sub> <sup>+</sup> | 259.12885         | -0.3                                                                       |
|           |                                                                            | 360.20337        | C <sub>17</sub> H <sub>30</sub> NO <sub>7</sub> <sup>-</sup>               | 360.20278         | 1.6                                                                        |                  |                                                                            |                   |                                                                            |

|           |                                                                            |                  |                                                                            |                  |                                                                            |                  |                                                                            |                  |      |
|-----------|----------------------------------------------------------------------------|------------------|----------------------------------------------------------------------------|------------------|----------------------------------------------------------------------------|------------------|----------------------------------------------------------------------------|------------------|------|
| ubas#5    | 4.26                                                                       | <b>361.16187</b> | <b>C<sub>15</sub>H<sub>25</sub>N<sub>2</sub>O<sub>8</sub><sup>-</sup></b>  | <b>361.16164</b> | 0.6                                                                        | <b>363.17587</b> | <b>C<sub>15</sub>H<sub>27</sub>N<sub>2</sub>O<sub>8</sub><sup>+</sup></b>  | <b>363.17619</b> | -0.9 |
|           |                                                                            | 73.02904         | C <sub>3</sub> H <sub>5</sub> O <sub>2</sub> <sup>-</sup>                  | 73.02950         | -6.3                                                                       | 129.06589        | C <sub>5</sub> H <sub>9</sub> N <sub>2</sub> O <sub>2</sub> <sup>+</sup>   | 129.06585        | 0.3  |
|           |                                                                            | 85.02925         | C <sub>4</sub> H <sub>5</sub> O <sub>2</sub> <sup>-</sup>                  | 85.02950         | -2.9                                                                       | 147.07635        | C <sub>5</sub> H <sub>11</sub> N <sub>2</sub> O <sub>3</sub> <sup>+</sup>  | 147.07642        | -0.5 |
|           |                                                                            | 102.05605        | C <sub>4</sub> H <sub>8</sub> NO <sub>2</sub> <sup>-</sup>                 | 102.05605        | 0                                                                          | 259.12863        | C <sub>11</sub> H <sub>19</sub> N <sub>2</sub> O <sub>5</sub> <sup>+</sup> | 259.12885        | -0.8 |
|           |                                                                            | 127.05131        | C <sub>5</sub> H <sub>7</sub> N <sub>2</sub> O <sub>2</sub> <sup>-</sup>   | 127.05130        | 0.1                                                                        |                  |                                                                            |                  |      |
|           |                                                                            | 145.06183        | C <sub>5</sub> H <sub>9</sub> N <sub>2</sub> O <sub>3</sub> <sup>-</sup>   | 145.06187        | -0.3                                                                       |                  |                                                                            |                  |      |
|           |                                                                            | 158.08220        | C <sub>7</sub> H <sub>12</sub> NO <sub>3</sub> <sup>-</sup>                | 158.08227        | -0.4                                                                       |                  |                                                                            |                  |      |
|           |                                                                            | 233.10286        | C <sub>10</sub> H <sub>17</sub> O <sub>6</sub> <sup>-</sup>                | 233.10306        | -0.9                                                                       |                  |                                                                            |                  |      |
|           |                                                                            | 301.12927        | C <sub>14</sub> H <sub>21</sub> O <sub>7</sub> <sup>-</sup>                | 301.12928        | 0                                                                          |                  |                                                                            |                  |      |
|           |                                                                            | 318.15588        | C <sub>14</sub> H <sub>24</sub> NO <sub>7</sub> <sup>-</sup>               | 318.15583        | 0.2                                                                        |                  |                                                                            |                  |      |
| ubas#6    | 6.71                                                                       | <b>578.27173</b> | <b>C<sub>28</sub>H<sub>40</sub>N<sub>3</sub>O<sub>10</sub><sup>-</sup></b> | <b>578.27192</b> | -0.3                                                                       | <b>580.28571</b> | <b>C<sub>28</sub>H<sub>42</sub>N<sub>3</sub>O<sub>10</sub><sup>+</sup></b> | <b>580.28647</b> | -1.3 |
|           |                                                                            | 73.02829         | C <sub>3</sub> H <sub>5</sub> O <sub>2</sub> <sup>-</sup>                  | 73.02950         | -16.6                                                                      | 105.06998        | C <sub>8</sub> H <sub>9</sub> <sup>+</sup>                                 | 105.06988        | 1.0  |
|           |                                                                            | 85.02837         | C <sub>4</sub> H <sub>5</sub> O <sub>2</sub> <sup>-</sup>                  | 85.02950         | -13.3                                                                      | 129.06587        | C <sub>5</sub> H <sub>9</sub> N <sub>2</sub> O <sub>2</sub> <sup>+</sup>   | 129.06585        | 0.2  |
|           |                                                                            | 98.02375         | C <sub>4</sub> H <sub>4</sub> NO <sub>2</sub> <sup>-</sup>                 | 98.02475         | -10.2                                                                      | 204.10205        | C <sub>12</sub> H <sub>14</sub> NO <sub>2</sub> <sup>+</sup>               | 204.10191        | 0.7  |
|           |                                                                            | 102.05508        | C <sub>4</sub> H <sub>8</sub> NO <sub>2</sub> <sup>-</sup>                 | 102.05605        | -9.5                                                                       | 222.11258        | C <sub>12</sub> H <sub>16</sub> NO <sub>3</sub> <sup>+</sup>               | 222.11247        | 0.5  |
|           |                                                                            | 127.05060        | C <sub>5</sub> H <sub>7</sub> N <sub>2</sub> O <sub>2</sub> <sup>-</sup>   | 127.05130        | -5.5                                                                       | 241.11823        | C <sub>11</sub> H <sub>17</sub> N <sub>2</sub> O <sub>4</sub> <sup>+</sup> | 241.11828        | -0.2 |
|           |                                                                            | 145.06151        | C <sub>5</sub> H <sub>9</sub> N <sub>2</sub> O <sub>3</sub> <sup>-</sup>   | 145.06187        | -2.5                                                                       | 402.19104        | C <sub>22</sub> H <sub>28</sub> NO <sub>6</sub> <sup>+</sup>               | 402.19111        | -0.2 |
|           |                                                                            | 158.08199        | C <sub>7</sub> H <sub>12</sub> NO <sub>3</sub> <sup>-</sup>                | 158.08227        | -1.8                                                                       | 419.21796        | C <sub>22</sub> H <sub>31</sub> N <sub>2</sub> O <sub>6</sub> <sup>+</sup> | 419.21766        | 0.7  |
|           |                                                                            | 202.08754        | C <sub>12</sub> H <sub>12</sub> NO <sub>2</sub> <sup>-</sup>               | 202.08735        | 0.9                                                                        | 462.22375        | C <sub>23</sub> H <sub>32</sub> N <sub>3</sub> O <sub>7</sub> <sup>+</sup> | 462.22348        | 0.6  |
|           |                                                                            | 247.11876        | C <sub>11</sub> H <sub>19</sub> O <sub>6</sub> <sup>-</sup>                | 247.11871        | 0.2                                                                        |                  |                                                                            |                  |      |
|           |                                                                            | 315.14502        | C <sub>15</sub> H <sub>23</sub> O <sub>7</sub> <sup>-</sup>                | 315.14493        | 0.3                                                                        |                  |                                                                            |                  |      |
|           |                                                                            | 332.17178        | C <sub>15</sub> H <sub>26</sub> NO <sub>7</sub> <sup>-</sup>               | 332.17148        | 0.9                                                                        |                  |                                                                            |                  |      |
|           |                                                                            | 375.17755        | C <sub>16</sub> H <sub>27</sub> N <sub>2</sub> O <sub>8</sub> <sup>-</sup> | 375.17729        | 0.7                                                                        |                  |                                                                            |                  |      |
| ubas#7    | 6.66                                                                       | <b>617.28296</b> | <b>C<sub>30</sub>H<sub>41</sub>N<sub>4</sub>O<sub>10</sub><sup>-</sup></b> | <b>617.28282</b> | 0.2                                                                        | <b>619.29651</b> | <b>C<sub>30</sub>H<sub>43</sub>N<sub>4</sub>O<sub>10</sub><sup>+</sup></b> | <b>619.29737</b> | -1.4 |
|           |                                                                            | 73.02809         | C <sub>3</sub> H <sub>5</sub> O <sub>2</sub> <sup>-</sup>                  | 73.02950         | -19.3                                                                      | 95.04915         | C <sub>6</sub> H <sub>7</sub> O <sup>+</sup>                               | 95.04914         | 0.1  |
|           |                                                                            | 85.02815         | C <sub>4</sub> H <sub>5</sub> O <sub>2</sub> <sup>-</sup>                  | 85.02950         | -15.9                                                                      | 129.06587        | C <sub>5</sub> H <sub>9</sub> N <sub>2</sub> O <sub>2</sub> <sup>+</sup>   | 129.06585        | 0.2  |
|           |                                                                            | 98.02348         | C <sub>4</sub> H <sub>4</sub> NO <sub>2</sub> <sup>-</sup>                 | 98.02475         | -13.0                                                                      | 144.08073        | C <sub>10</sub> H <sub>10</sub> N <sup>+</sup>                             | 144.08078        | -0.3 |
|           |                                                                            | 102.05481        | C <sub>4</sub> H <sub>8</sub> NO <sub>2</sub> <sup>-</sup>                 | 102.05605        | -12.1                                                                      | 147.07648        | C <sub>5</sub> H <sub>11</sub> N <sub>2</sub> O <sub>3</sub> <sup>+</sup>  | 147.07642        | 0.4  |
|           |                                                                            | 127.05060        | C <sub>5</sub> H <sub>7</sub> N <sub>2</sub> O <sub>2</sub> <sup>-</sup>   | 127.05130        | -5.5                                                                       | 243.11279        | C <sub>14</sub> H <sub>15</sub> N <sub>2</sub> O <sub>2</sub> <sup>+</sup> | 243.11280        | 0    |
|           |                                                                            | 141.05476        | C <sub>7</sub> H <sub>9</sub> O <sub>3</sub> <sup>-</sup>                  | 141.05572        |                                                                            | 255.11276        | C <sub>15</sub> H <sub>15</sub> N <sub>2</sub> O <sub>2</sub> <sup>+</sup> | 255.11280        | -0.2 |
|           |                                                                            | 145.06126        | C <sub>5</sub> H <sub>9</sub> N <sub>2</sub> O <sub>3</sub> <sup>-</sup>   | 145.06187        | -4.2                                                                       | 259.12885        | C <sub>11</sub> H <sub>19</sub> N <sub>2</sub> O <sub>5</sub> <sup>+</sup> | 259.12885        | 0    |
|           |                                                                            | 158.08173        | C <sub>7</sub> H <sub>12</sub> NO <sub>3</sub> <sup>-</sup>                | 158.08227        | -3.4                                                                       | 261.12335        | C <sub>14</sub> H <sub>17</sub> N <sub>2</sub> O <sub>3</sub> <sup>+</sup> | 261.12337        | -0.1 |
|           |                                                                            | 241.09781        | C <sub>14</sub> H <sub>13</sub> N <sub>2</sub> O <sub>2</sub> <sup>-</sup> | 241.09825        |                                                                            | 273.12341        | C <sub>15</sub> H <sub>17</sub> N <sub>2</sub> O <sub>3</sub> <sup>+</sup> | 273.12337        | 0.1  |
|           |                                                                            | 247.11807        | C <sub>11</sub> H <sub>19</sub> O <sub>6</sub> <sup>-</sup>                | 247.11871        | -2.6                                                                       | 337.15479        | C <sub>20</sub> H <sub>21</sub> N <sub>2</sub> O <sub>3</sub> <sup>+</sup> | 337.15467        | 0.4  |
|           |                                                                            | 315.14398        | C <sub>15</sub> H <sub>23</sub> O <sub>7</sub> <sup>-</sup>                | 315.14493        | -3.0                                                                       | 355.16537        | C <sub>20</sub> H <sub>23</sub> N <sub>2</sub> O <sub>4</sub> <sup>+</sup> | 355.16523        | 0.4  |
|           |                                                                            | 332.17072        | C <sub>15</sub> H <sub>26</sub> NO <sub>7</sub> <sup>-</sup>               | 332.17148        | -2.3                                                                       | 373.17581        | C <sub>20</sub> H <sub>25</sub> N <sub>2</sub> O <sub>5</sub> <sup>+</sup> | 373.17580        | 0    |
|           |                                                                            | 375.17633        | C <sub>16</sub> H <sub>27</sub> N <sub>2</sub> O <sub>8</sub> <sup>-</sup> | 375.17729        | -2.6                                                                       | 441.20239        | C <sub>24</sub> H <sub>29</sub> N <sub>2</sub> O <sub>6</sub> <sup>+</sup> | 441.20201        | 0.9  |
|           |                                                                            | 489.22327        | C <sub>25</sub> H <sub>33</sub> N <sub>2</sub> O <sub>8</sub> <sup>-</sup> | 489.22424        |                                                                            | 458.22885        | C <sub>24</sub> H <sub>32</sub> N <sub>3</sub> O <sub>6</sub> <sup>+</sup> | 458.22856        | 0.6  |
|           |                                                                            | 557.24866        | C <sub>29</sub> H <sub>37</sub> N <sub>2</sub> O <sub>9</sub> <sup>-</sup> | 557.25045        |                                                                            | 484.20786        | C <sub>25</sub> H <sub>30</sub> N <sub>3</sub> O <sub>7</sub> <sup>+</sup> | 484.20783        | 0.1  |
|           |                                                                            |                  |                                                                            | 501.23471        | C <sub>25</sub> H <sub>33</sub> N <sub>4</sub> O <sub>7</sub> <sup>+</sup> | 501.23438        | 0.7                                                                        |                  |      |
| ubas#8    | 4.8                                                                        | <b>495.20953</b> | <b>C<sub>22</sub>H<sub>31</sub>N<sub>4</sub>O<sub>9</sub><sup>-</sup></b>  | <b>495.20965</b> | -0.2                                                                       | <b>497.22382</b> | <b>C<sub>22</sub>H<sub>33</sub>N<sub>4</sub>O<sub>9</sub><sup>+</sup></b>  | <b>497.22421</b> | -0.8 |
|           |                                                                            | 73.02824         | C <sub>3</sub> H <sub>5</sub> O <sub>2</sub> <sup>-</sup>                  | 73.02950         | -17.3                                                                      | 66.03432         | C <sub>4</sub> H <sub>4</sub> N <sup>+</sup>                               | 66.03383         | 7.4  |
|           |                                                                            | 85.02834         | C <sub>4</sub> H <sub>5</sub> O <sub>2</sub> <sup>-</sup>                  | 85.02950         | -13.6                                                                      | 93.04485         | C <sub>5</sub> H <sub>5</sub> N <sub>2</sub> <sup>+</sup>                  | 93.04472         | 1.4  |
|           |                                                                            | 93.04472         | C <sub>5</sub> H <sub>5</sub> N <sub>2</sub> <sup>-</sup>                  | 93.04582         | -11.8                                                                      | 121.03969        | C <sub>6</sub> H <sub>5</sub> N <sub>2</sub> O <sup>+</sup>                | 121.03964        | 0.4  |
|           |                                                                            | 102.05504        | C <sub>4</sub> H <sub>8</sub> NO <sub>2</sub> <sup>-</sup>                 | 102.05605        | -9.9                                                                       | 129.06584        | C <sub>5</sub> H <sub>9</sub> N <sub>2</sub> O <sub>2</sub> <sup>+</sup>   | 129.06585        | -0.1 |
|           |                                                                            | 119.02426        | C <sub>6</sub> H <sub>3</sub> N <sub>2</sub> O <sup>-</sup>                | 119.02509        | -7.0                                                                       | 319.12891        | C <sub>16</sub> H <sub>19</sub> N <sub>2</sub> O <sub>5</sub> <sup>+</sup> | 319.12885        | 0.2  |
|           |                                                                            | 137.03505        | C <sub>6</sub> H <sub>5</sub> N <sub>2</sub> O <sub>2</sub> <sup>-</sup>   | 137.03565        | -4.4                                                                       | 379.16119        | C <sub>17</sub> H <sub>23</sub> N <sub>4</sub> O <sub>6</sub> <sup>+</sup> | 379.16121        | -0.1 |
|           |                                                                            | 367.15103        | C <sub>17</sub> H <sub>23</sub> N <sub>2</sub> O <sub>7</sub> <sup>-</sup> | 367.15107        | -0.1                                                                       |                  |                                                                            |                  |      |
|           |                                                                            | 435.17740        | C <sub>21</sub> H <sub>27</sub> N <sub>2</sub> O <sub>8</sub> <sup>-</sup> | 435.17729        | 0.3                                                                        |                  |                                                                            |                  |      |
|           |                                                                            | 452.20419        | C <sub>21</sub> H <sub>30</sub> N <sub>3</sub> O <sub>8</sub> <sup>-</sup> | 452.20384        | 0.8                                                                        |                  |                                                                            |                  |      |
| 478.18317 | C <sub>22</sub> H <sub>28</sub> N <sub>3</sub> O <sub>9</sub> <sup>-</sup> | 478.18310        | 0.1                                                                        |                  |                                                                            |                  |                                                                            |                  |      |

|               |     |                  |                                                                             |                  |      |                  |                                                                             |                  |      |
|---------------|-----|------------------|-----------------------------------------------------------------------------|------------------|------|------------------|-----------------------------------------------------------------------------|------------------|------|
| <b>ubas#9</b> | 5.1 | <b>685.25964</b> | <b>C<sub>27</sub>H<sub>46</sub>N<sub>2</sub>PO<sub>16</sub><sup>-</sup></b> | <b>685.25904</b> | 0.9  | <b>687.27307</b> | <b>C<sub>27</sub>H<sub>48</sub>N<sub>2</sub>PO<sub>16</sub><sup>+</sup></b> | <b>687.27469</b> | -2.4 |
|               |     | 78.95899         | PO <sub>3</sub> <sup>-</sup>                                                | 78.95905         | -0.8 | 101.05981        | C <sub>5</sub> H <sub>9</sub> O <sub>2</sub> <sup>+</sup>                   | 101.05971        | 1.0  |
|               |     | 96.96950         | H <sub>2</sub> PO <sub>4</sub> <sup>-</sup>                                 | 96.96962         | -1.2 | 113.05976        | C <sub>6</sub> H <sub>9</sub> O <sub>2</sub> <sup>+</sup>                   | 113.05971        | 0.4  |
|               |     | 209.02197        | C <sub>6</sub> H <sub>10</sub> PO <sub>6</sub> <sup>-</sup>                 | 209.02205        | -0.4 | 129.06586        | C <sub>5</sub> H <sub>9</sub> N <sub>2</sub> O <sub>2</sub> <sup>+</sup>    | 129.06585        | 0.1  |
|               |     | 309.07474        | C <sub>11</sub> H <sub>18</sub> PO <sub>8</sub> <sup>-</sup>                | 309.07448        | 0.8  | 147.07648        | C <sub>5</sub> H <sub>11</sub> N <sub>2</sub> O <sub>3</sub> <sup>+</sup>   | 147.07642        | 0.4  |
|               |     |                  |                                                                             |                  |      | 199.09662        | C <sub>10</sub> H <sub>15</sub> O <sub>4</sub> <sup>+</sup>                 | 199.09649        | 0.7  |
|               |     |                  |                                                                             |                  |      | 259.12885        | C <sub>11</sub> H <sub>19</sub> N <sub>2</sub> O <sub>5</sub> <sup>+</sup>  | 259.12885        | 0    |
|               |     |                  |                                                                             |                  |      | 341.17078        | C <sub>16</sub> H <sub>25</sub> N <sub>2</sub> O <sub>6</sub> <sup>+</sup>  | 341.17071        | 0.2  |
|               |     |                  |                                                                             |                  |      | 359.18124        | C <sub>16</sub> H <sub>27</sub> N <sub>2</sub> O <sub>7</sub> <sup>+</sup>  | 359.18128        | -0.1 |
